# Supplementary material
Source: HighWire-hosted journal article supplement (https://bmjophth.bmj.com/content/8/1/e001238)
Supplement: inline-supplementary-material-2 [file inline-supplementary-material-2.pdf]

- 1 **Supplementary material 2: Distribution by department of the incident keratoconus patients**
- 2 **based on SISPRO [1].**

| Departament        | Number of patients with keratoconus | % of keratoconus by department |
|--------------------|-------------------------------------|--------------------------------|
| Bogotá, D.C.       | 8,959                               | 48.63                          |
| Antioquia          | 2,587                               | 14.04                          |
| Dep_nodef          | 1,771                               | 9.61                           |
| Cundinamarca       | 1,912                               | 10.38                          |
| Valle del Cauca    | 609                                 | 3.3                            |
| Nariño             | 622                                 | 3.37                           |
| Boyacá             | 468                                 | 2.54                           |
| Caldas             | 209                                 | 1.13                           |
| Cauca              | 290                                 | 1.57                           |
| Santander          | 211                                 | 1.14                           |
| Quindio            | 43                                  | 0.23                           |
| Risaralda          | 71                                  | 0.38                           |
| Tolima             | 112                                 | 0.60                           |
| Atlántico          | 81                                  | 0.43                           |
| Huila              | 76                                  | 0.41                           |
| Meta               | 66                                  | 0.35                           |
| Córdoba            | 65                                  | 0.35                           |
| Norte de Santander | 48                                  | 0.26                           |
| Sucre              | 30                                  | 0.16                           |
| Bolívar            | 33                                  | 0.17                           |
| Cesar              | 42                                  | 0.22                           |

|                            |        |        |
|----------------------------|--------|--------|
| Putumayo                   | 27     | 0.14   |
| Magdalena                  | 33     | 0.17   |
| Casanare                   | 7      | 0.03   |
| Caquetá                    | 17     | 0.09   |
| Chocó                      | 10     | 0.05   |
| La Guajira                 | 8      | 0.04   |
| San Andrés,<br>Providencia | 1      | 0.01   |
| Arauca                     | 2      | 0.01   |
| Guaviare                   | 5      | 0.03   |
| Vaupés                     | 3      | 0.02   |
| Amazonas                   | 0      | 0,00   |
| Guainía                    | 1      | 0.01   |
| Vichada                    | 0      | 0.00   |
| Total                      | 18,419 | 100.00 |

3

4 **REFERENCES:**

5 1. Minsalud. Indicadores Sistema Integrado de Información de la Protección social (SISPRO). 2022.

6 <https://www.sispro.gov.co/Pages/Home.aspx>. Accessed 18 Apr 2022

7
